# Supplementary material
Source: Springer Nature journal article supplement (https://www.springermedizin.de/resource/supplementary/12986_2007_130_MOESM4_ESM.pdf/25655500)

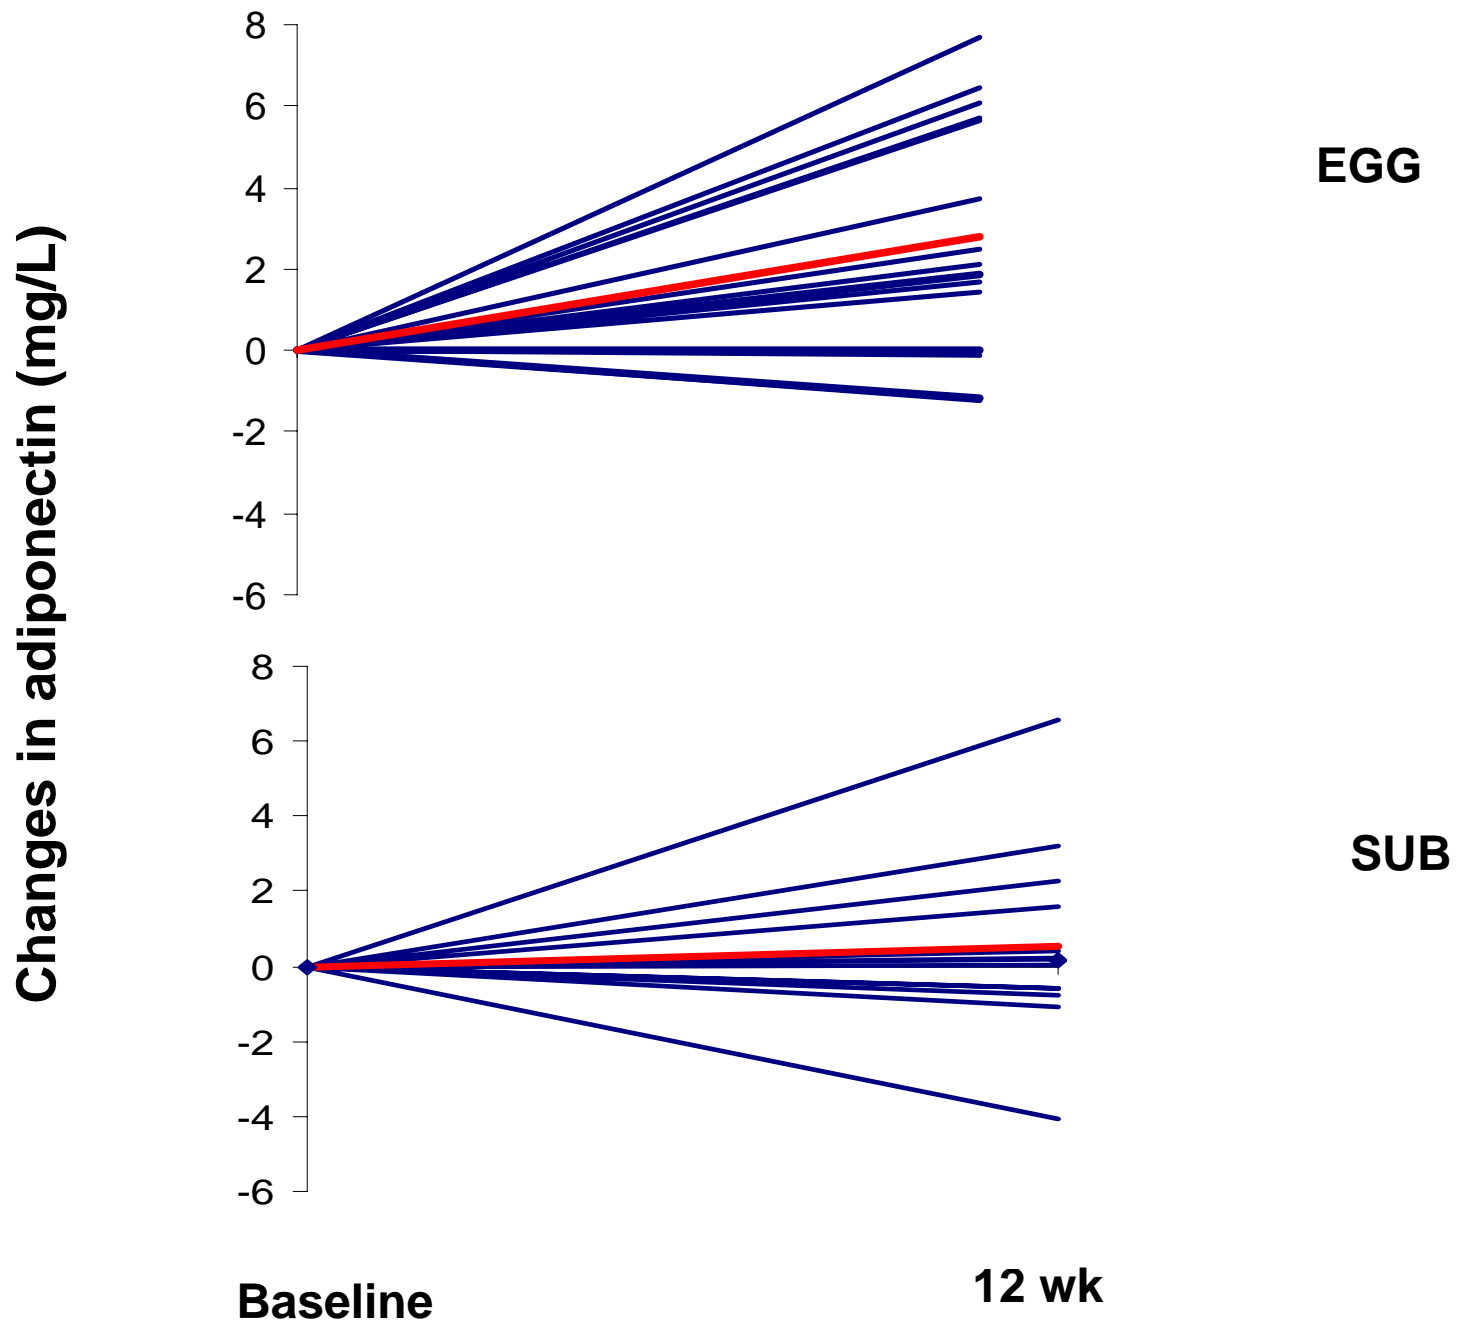

Supplement: MOESM4 [file 25655500]
